# Supplementary material for: The Role of Social Media in Online Weight Management: Systematic Review
Source: PubMed Central journal article supplement (PMC3868982; doi:10.2196/jmir.2852), 2013-11-28
Supplement: jmir_v15i11e262_app1.pdf [file jmir_v15i11e262_app1.pdf]

## Appendix A. Full PubMed search criteria

("social media"[TIAB] OR "social bookmarking"[TIAB] OR "social technology"[TIAB] OR "social technologies"[TIAB] OR "folksonomy"[TIAB] OR "folksonomies"[TIAB]) OR ("mashup"[TIAB] OR "mashups"[TIAB]) OR (wikis[TIAB] OR wiki[TIAB] OR wikipedia[TIAB]) OR blog\*[TIAB] OR ("social networking"[TIAB] OR "social networks"[TIAB] OR "social network"[TIAB] OR "online community"[TIAB] OR "online communities"[TIAB] OR facebook[TIAB] OR myspace[TIAB] OR ning[TIAB]) OR ((youtube[TIAB] OR "flickr"[TIAB] OR (twitter[TIAB] OR tweet[TIAB]) OR (delicious[TIAB])))

AND

((Obesity[MeSH] OR (Weight gain[MeSH] OR (Weight loss[MeSH] OR (Body mass index[MeSH] OR (skinfold thickness[MeSH] OR (waist-hip ratio[MeSH] OR (abdominal fat[MeSH] OR (overweight[MeSH] OR (overweight\*[TIAB] OR overweight[TIAB] OR over-weight[TIAB]) OR ("fat overload"[TIAB] AND syndrom\*[TIAB]) OR (overeat\*[TIAB] OR over-eat\*[TIAB]) OR (overfeed\*[TIAB] OR over-feed\*[TIAB]) OR (adipos\*[TIAB] OR (obes\*[TIAB] OR ("body mass index"[TIAB] OR "body mass indices"[TIAB] OR "body mass indexes"[TIAB] OR BMI[TIAB]) OR (waist-hip[TIAB] AND ratio\*[TIAB]) OR (skinfold[TIAB] AND thickness\*[TIAB]) OR (abdominal[TIAB] AND fat\*[TIAB]) OR weight[TIAB] OR (Metabolic Syndrome X[MeSH] OR "metabolic syndrome"[TIAB]) OR ("bariatric surgery"[MeSH Terms] OR "bariatric surgery"[TIAB]))) OR "Motor Activity" [Mesh] OR "sports" [Mesh] OR "physical fitness" [Mesh] OR "physical exertion" [Mesh] OR "physical activity" [All Fields] OR "exercise" [All Fields] OR "walking" [Mesh]) OR "diet" [All Fields] OR "food" [MeSH] OR "hunger" [MeSH]
