# Supplementary material for: The Role of Social Media in Online Weight Management: Systematic Review
Source: J Med Internet Res. 2013 Nov 28;15(11):e262. doi: 10.2196/jmir.2852 (PMC3868982; doi:10.2196/jmir.2852)
Supplement: Supplementary file 3 [file jmir_v15i11e262_app3.pdf]

## Appendix C. Jadad scale to evaluate risk for bias

|                                   | Randomized | Double-blinded | Description of withdrawals & dropouts | Method for randomization | Method for Blinding | Jadad Score (Max =5) | Risk of Bias |
|-----------------------------------|------------|----------------|---------------------------------------|--------------------------|---------------------|----------------------|--------------|
| <b>Diet</b>                       |            |                |                                       |                          |                     |                      |              |
| Verheijden (2004)                 | 1          | 0              | 1                                     | 1                        | 1                   | 4                    | Low          |
| <b>Physical Activity</b>          |            |                |                                       |                          |                     |                      |              |
| Hurling (2007)                    | 1          | 0              | 1                                     | 0                        | 0                   | 2                    | Moderate     |
| Ferney (2009)                     | 1          | 0              | 0                                     | 1                        | 0                   | 2                    | Moderate     |
| Liebreich (2009)                  | 1          | 0              | 0                                     | 0                        | 1                   | 1                    | High         |
| Richardson (2010)                 | 1          | 0              | 1                                     | 1                        | 0                   | 3                    | Moderate     |
| Cavallo (2012)                    | 1          | 0              | 0                                     | 0                        | 0                   | 1                    | High         |
| <b>Diet and Physical Activity</b> |            |                |                                       |                          |                     |                      |              |
| Tate (2001)                       | 1          | 0              | 1                                     | 0                        | 0                   | 2                    | Moderate     |
| Tate (2003)                       | 1          | 0              | 1                                     | 1                        | 0                   | 3                    | Moderate     |
| Womble (2004)                     | 1          | 0              | 1                                     | 0                        | 0                   | 2                    | Moderate     |
| Tate (2006)                       | 1          | 0              | 0                                     | 1                        | 0                   | 2                    | Moderate     |
| Gold (2007)                       | 1          | 0              | 1                                     | 0                        | 0                   | 2                    | Moderate     |
| Webber (2007)                     | 1          | 0              | 0                                     | 0                        | 0                   | 1                    | High         |
| Morgan (2009)                     | 1          | 1              | 1                                     | 1                        | 1                   | 5                    | Low          |
| Sternfeld (2009)                  | 1          | 0              | 0                                     | 0                        | 0                   | 1                    | High         |
| Harvey-Berino (2010)              | 1          | 0              | 1                                     | 1                        | 0                   | 3                    | Moderate     |
| Turner McGrievy (2011)            | 1          | 0              | 0                                     | 1                        | 0                   | 2                    | Moderate     |
| Brindal (2012)                    | 1          | 1              | 1                                     | 1                        | 1                   | 5                    | Low          |
| Napolitano (2013)                 | 1          | 0              | 0                                     | 0                        | 0                   | 1                    | High         |
| <b>Weight Maintenance</b>         |            |                |                                       |                          |                     |                      |              |
| Harvey-Berino (2004)              | 1          | 0              | 1                                     | 0                        | 0                   | 2                    | Moderate     |
| Cussler (2008)                    | 1          | 0              | 0                                     | 0                        | 0                   | 1                    | High         |
|                                   |            |                |                                       |                          | Median Score        | 2                    | Moderate     |

Score of 0-1= High Risk of Bias

Score of 2-3= Moderate Risk of Bias

Score of 4-5= Low Risk of Bias
