# Supplementary material for: The Role of Social Media in Online Weight Management: Systematic Review
Source: J Med Internet Res. 2013 Nov 28;15(11):e262. doi: 10.2196/jmir.2852 (PMC3868982; doi:10.2196/jmir.2852)
Supplement: Supplementary file 4 [file jmir_v15i11e262_app4.pdf]

**Appendix D.** Randomized control trial quality scores adapted from Norman et al.

|                                   | Individual<br>randomizati<br>on | Control<br>group | Social<br>Media<br>Isolated | Pre-<br>post<br>test<br>desig<br>n | Retention<br>80% | Baseline<br>groups<br>equivale<br>nt | Missing<br>data | Sample<br>size<br>calculati<br>on | Validated<br>measure<br>s | Score<br>(Max=<br>9) | Quality  |
|-----------------------------------|---------------------------------|------------------|-----------------------------|------------------------------------|------------------|--------------------------------------|-----------------|-----------------------------------|---------------------------|----------------------|----------|
| <b>Diet</b>                       |                                 |                  |                             |                                    |                  |                                      |                 |                                   |                           |                      |          |
| Verheijden (2004)                 | Y                               | Y                | N                           | Y                                  | Y                | Y                                    | Y               | Y                                 | Y                         | 8                    | High     |
| <b>Physical Activity</b>          |                                 |                  |                             |                                    |                  |                                      |                 |                                   |                           |                      |          |
| Hurling (2007)                    | Y                               | Y                | N                           | Y                                  | Y                | Y                                    | Y               | N                                 | Y                         | 7                    | High     |
| Ferney (2009)                     | Y                               | Y                | N                           | Y                                  | Y                | N                                    | Y               | N                                 | Y                         | 6                    | Moderate |
| Liebreich (2009)                  | Y                               | Y                | N                           | Y                                  | Y                | N                                    | Y               | N                                 | Y                         | 6                    | Moderate |
| Richardson (2010)                 | Y                               | Y                | Y                           | Y                                  | N                | N                                    | Y               | Y                                 | Y                         | 7                    | High     |
| Cavallo (2012)                    | Y                               | Y                | N                           | Y                                  | Y                | Y                                    | N               | Y                                 | Y                         | 8                    | High     |
| <b>Diet and Physical Activity</b> |                                 |                  |                             |                                    |                  |                                      |                 |                                   |                           |                      |          |
| Tate (2001)                       | Y                               | Y                | N                           | Y                                  | N                | Y                                    | N               | Y                                 | Y                         | 6                    | Moderate |
| Tate (2003)                       | Y                               | Y                | N                           | Y                                  | Y                | Y                                    | Y               | N                                 | Y                         | 7                    | High     |
| Womble (2004)                     | Y                               | Y                | N                           | Y                                  | N                | Y                                    | Y               | Y                                 | Y                         | 7                    | High     |
| Tate (2006)                       | Y                               | Y                | N                           | Y                                  | Y                | Y                                    | Y               | Y                                 | Y                         | 8                    | High     |
| Gold (2007)                       | Y                               | Y                | N                           | Y                                  | N                | Y                                    | Y               | N                                 | Y                         | 6                    | Moderate |
| Webber (2007)                     | Y                               | Y                | N                           | Y                                  | Y                | Y                                    | Y               | Y                                 | Y                         | 8                    | High     |
| Morgan (2009)                     | Y                               | Y                | N                           | Y                                  | Y                | Y                                    | Y               | Y                                 | Y                         | 8                    | High     |
| Sternfeld (2009)                  | Y                               | Y                | N                           | Y                                  | N                | N                                    | Y               | N                                 | Y                         | 5                    | Moderate |
| Harvey-Berino (2010)              | Y                               | Y                | N                           | Y                                  | Y                | Y                                    | Y               | Y                                 | Y                         | 8                    | High     |
| Turner McGrievy (2011)            | Y                               | Y                | N                           | Y                                  | Y                | Y                                    | Y               | Y                                 | Y                         | 8                    | High     |
| Brindal (2012)                    | Y                               | Y                | N                           | Y                                  | N                | U                                    | Y               | N                                 | Y                         | 5                    | Moderate |
| Napolitano (2013)                 | Y                               | Y                | N                           | Y                                  | Y                | Y                                    | Y               | N                                 | Y                         | 7                    | High     |
| <b>Weight Maintenance</b>         |                                 |                  |                             |                                    |                  |                                      |                 |                                   |                           |                      |          |
| Harvey-Berino (2004)              | Y                               | Y                | N                           | Y                                  | N                | Y                                    | Y               | Y                                 | Y                         | 7                    | High     |
| Cussler (2008)                    | Y                               | Y                | N                           | Y                                  | N                | Y                                    | Y               | N                                 | Y                         | 6                    | Moderate |

Median  
Score 7.0 High

Scores of 7-9= High Quality

Scores of 4-6= Moderate Quality

Scores of 0-3= Low Quality
